# Supplementary material for: An anthraquinone moiety/cysteamine functionalized-gold nanoparticle/chitosan based nanostructured composite for the electroanalytical detection of dissolved oxygen within aqueous media
Source: Royal Society of Chemistry journal article supplement (doi:10.1039/c4ay01207k), 2014-01-01

|                                    | Area (%) | Height | Width (mm) |
|------------------------------------|----------|--------|------------|
| 1,2,4,5-Tetrahydroquinoline        | 1.01     | 1.00   | 1.00       |
| 1,2,3,4-Tetrahydroquinoline        | 1.01     | 1.0    | 1.00       |
| 1,2,3,4,6,7,8,9-Octahydroquinoline | 1.01     | 1.0    | 1.00       |

Peak purity: 100%

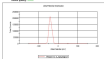

Supplement: c4ay01207k3.pdf [file c4ay01207k3.pdf]
