# Supplementary figures and images for: An anthraquinone moiety/cysteamine functionalized-gold nanoparticle/chitosan based nanostructured composite for the electroanalytical detection of dissolved oxygen within aqueous media
Source: Royal Society of Chemistry journal article supplement (doi:10.1039/c4ay01207k), 2014-01-01

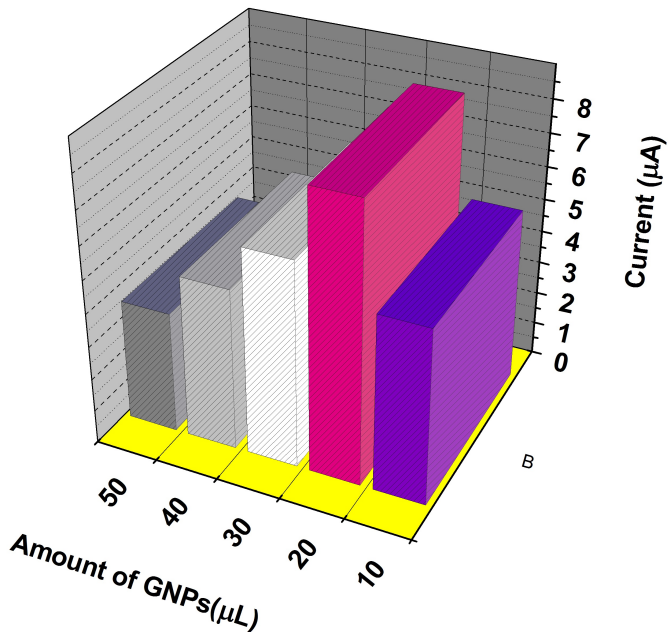

Supplement: c4ay01207k2.pdf [file c4ay01207k2.pdf]

|                     | Area (%)    | Area (%) | Area (%) |
|---------------------|-------------|----------|----------|
| Area 1 (1.000) 97.1 | Peak 1 97.1 | 99.9     | 1700     |
| Area 2 (1.000) 1.91 | Peak 2 1.91 | 1.1      | 1.00     |
| Area 3 (1.000) 1.00 | Peak 3 1.00 | 99.0     | 999      |

Peak quality: **Good**

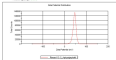

Supplement: c4ay01207k4.pdf [file c4ay01207k4.pdf]

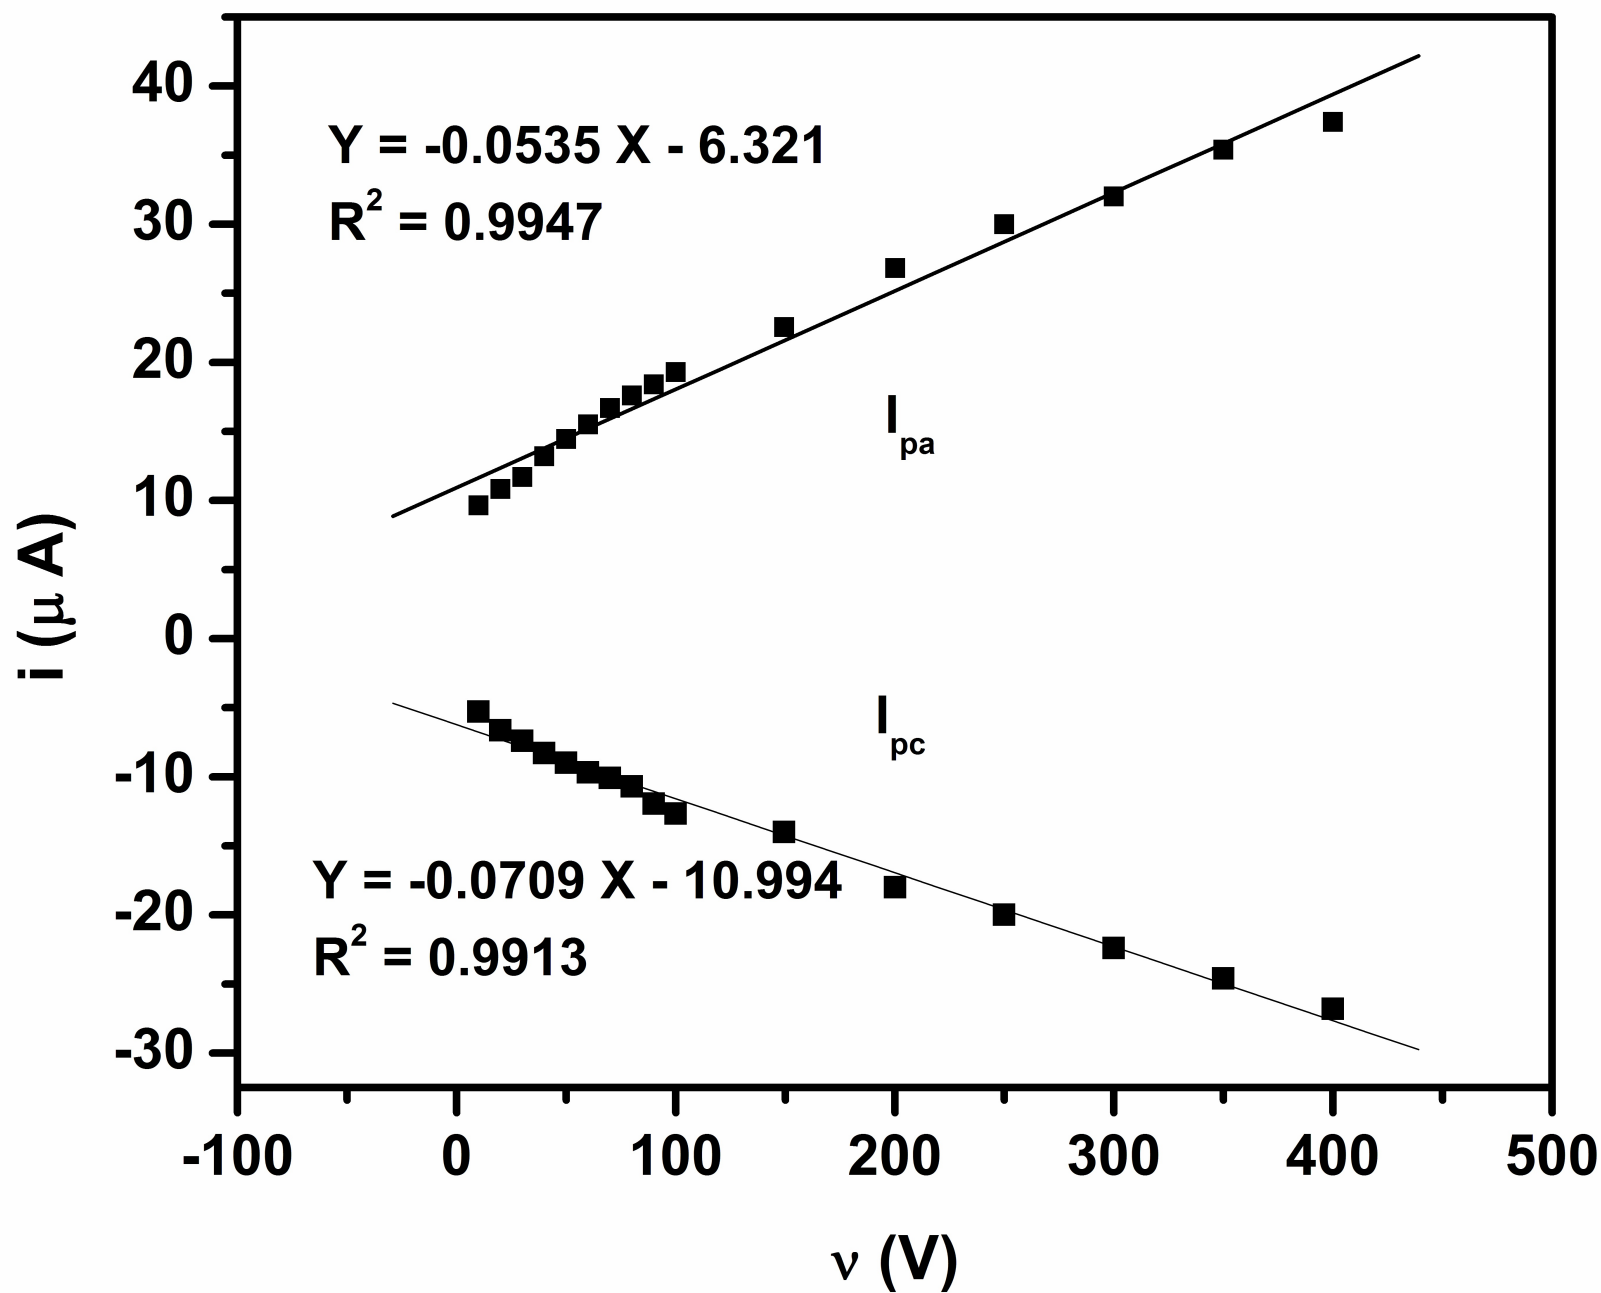

Supplement: c4ay01207k5.pdf [file c4ay01207k5.pdf]
